# Supplementary material for: Tough double network hydrogels with rapid self-reinforcement and low hysteresis based on highly entangled networks
Source: PubMed Central journal article supplement (PMC10864390; doi:10.1038/s41467-024-45485-8), 2024-02-13
Supplement: 41467_2024_45485_MOESM1_ESM.pdf [file 41467_2024_45485_MOESM1_ESM.pdf]

## Supplementary Information

### **Tough double network hydrogel with rapid self-reinforcement and low hysteresis based on highly entangled networks**

Ruixin Zhu,<sup>1,2</sup> Dandan Zhu,<sup>1,2</sup> Zhen Zheng,<sup>1,2</sup> Xinling Wang,<sup>\*,1,2</sup>

<sup>1</sup> School of Chemistry and Chemical Engineering, Shanghai Jiao Tong University, Shanghai 200240, China

<sup>2</sup> State Key Laboratory of Metal Matrix Composites, Shanghai Jiao Tong University, Shanghai 200240, China

\*Corresponding authors. E-mail address: [xlwang@sjtu.edu.cn](mailto:xlwang@sjtu.edu.cn) (X. Wang)

Contact information for authors.

Ruixin Zhu [zhuruixin@sjtu.edu.cn](mailto:zhuruixin@sjtu.edu.cn)

Dandan Zhu [zhudan@sjtu.edu.cn](mailto:zhudan@sjtu.edu.cn)

[Zhen Zheng zzheng@sjtu.edu.cn](mailto:Zhen Zheng zzheng@sjtu.edu.cn)

#### **The file includes:**

Supplementary Tables 1 to 3

Supplementary Figures 1 to 21

## Supplementary Tables

**Supplementary Table 1** Formulation of high entanglement first network hydrogels

(HEDN1st)

| Hydrogel    | AAm [g] | AMPS [g] | MBAA [mg] | I2959 [mg] | H <sub>2</sub> O [mL] |
|-------------|---------|----------|-----------|------------|-----------------------|
| HEDN1st-0.2 | 8.63    | 0.2      | 0.189     | 0.110      | 4.41                  |
| HEDN1st-0.4 | 8.63    | 0.4      | 0.190     | 0.111      | 4.44                  |
| HEDN1st-0.6 | 8.63    | 0.6      | 0.191     | 0.111      | 4.47                  |
| HEDN1st-0.7 | 8.63    | 0.7      | 0.192     | 0.112      | 4.49                  |
| HEDN1st-0.8 | 8.63    | 0.8      | 0.193     | 0.112      | 4.51                  |
| HEDN1st-1.0 | 8.63    | 1.0      | 0.195     | 0.113      | 4.54                  |
| HEDN1st-1.5 | 8.63    | 1.5      | 0.198     | 0.115      | 4.63                  |
| HEDN1st-2.0 | 8.63    | 2.0      | 0.202     | 0.117      | 4.72                  |
| HEDN1st-3.0 | 8.63    | 3.0      | 0.210     | 0.122      | 4.89                  |
| HEDN1st-4.0 | 8.63    | 4.0      | 0.217     | 0.126      | 5.07                  |

**Supplementary Table 2** Preparation formula of HEDN1st-0.8 hydrogels with different entanglement degree. W is the molar ratio of water to total monomer

| Hydrogel        | AAm [g] | AMPS [g] | MBAA [mg] | I2959 [mg] | H <sub>2</sub> O [mL] |
|-----------------|---------|----------|-----------|------------|-----------------------|
| HEDN1st-0.8-W2  | 8.63    | 0.8      | 0.193     | 0.112      | 4.51                  |
| HEDN1st-0.8-W4  | 8.63    | 0.8      | 0.193     | 0.112      | 9.02                  |
| HEDN1st-0.8-W6  | 8.63    | 0.8      | 0.193     | 0.112      | 13.53                 |
| HEDN1st-0.8-W8  | 8.63    | 0.8      | 0.193     | 0.112      | 18.04                 |
| HEDN1st-0.8-W10 | 8.63    | 0.8      | 0.193     | 0.112      | 22.55                 |

**Supplementary Table 3** Basic parameters of hydrogels with strain-stiffening characteristics

|                              | References                                             | Water content (%) | Stress at break (MPa) | Strain-stiffening capability |
|------------------------------|--------------------------------------------------------|-------------------|-----------------------|------------------------------|
| HEDN-0.8                     | This work                                              | 89                | 3.0                   | 47.5                         |
| HEDN-AAc-3.0                 | This work                                              | 92                | 2.1                   | 26.7                         |
| P(AM-AN-MA)/Fe <sup>3+</sup> | Adv. Funct. Mater. 2023, 2210224.                      | 84                | 1.4                   | 28                           |
| PVAm/EGDE-Zn <sup>2+</sup>   | ACS Appl. Mater. Interfaces 2022, 14, 27, 31354–31362. | 85                | 1.3                   | 10                           |
| CNF-g-pHEMA/pHEMA            | Cellulose volume 28, pages1489–1497 (2021).            | 67.9              | 2.1                   | 15.4                         |
| QCS-AMP/PAAm                 | J. Mater. Chem. A, 2021, 9, 1835-1844.                 | 75                | 0.35                  | 12.3                         |
| SRC-7-20                     | Adv. Funct. Mater. 2021, 31, 2104139.                  | 60                | 5                     | 32                           |
| PAAS/PAAm                    | ACS Appl. Mater. Interfaces 2022, 14, 47148–47156.     | 75                | 0.8                   | 13                           |

## Supplementary Figures

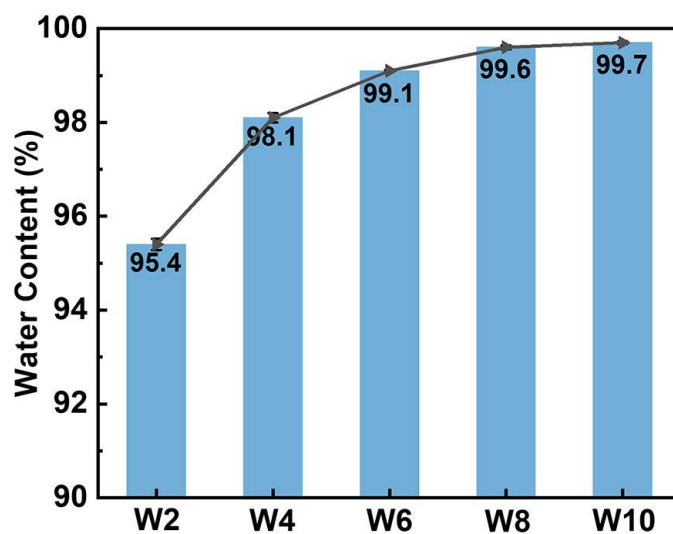

**Supplementary Figure 1** Water content of fully swollen HEDN1st-0.8-W hydrogels with different W. W is the molar ratio of water to total monomer. Error bars represent mean +/- standard deviation (n=5).

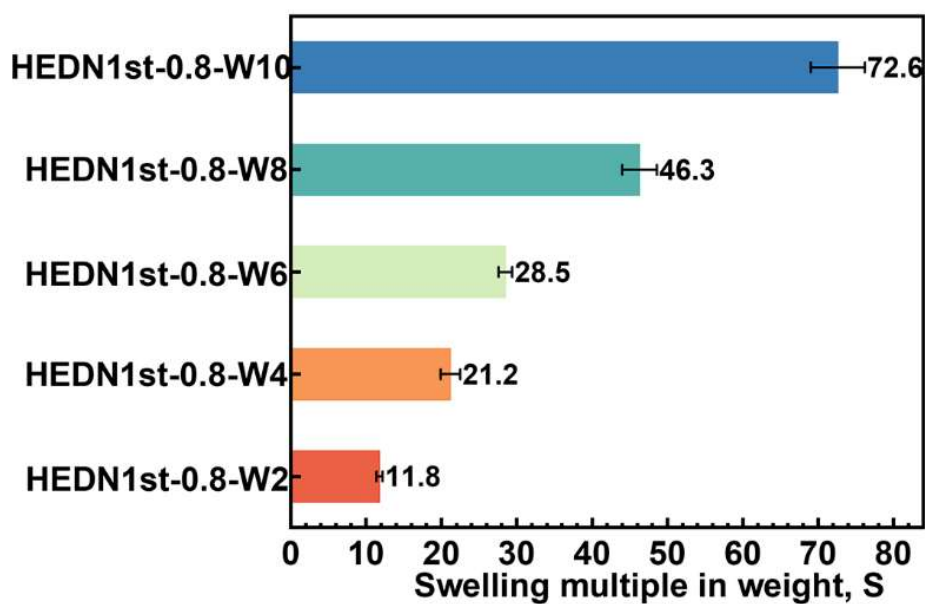

**Supplementary Figure 2** Swelling multiple in weight of HEDN1st hydrogels obtained at different concentrations in 4 M AAm solution. W is the molar ratio of water to total monomer, e.g., W2 means that the molar ratio of water to total monomer is 2. Error bars represent mean +/- standard deviation (n=5).

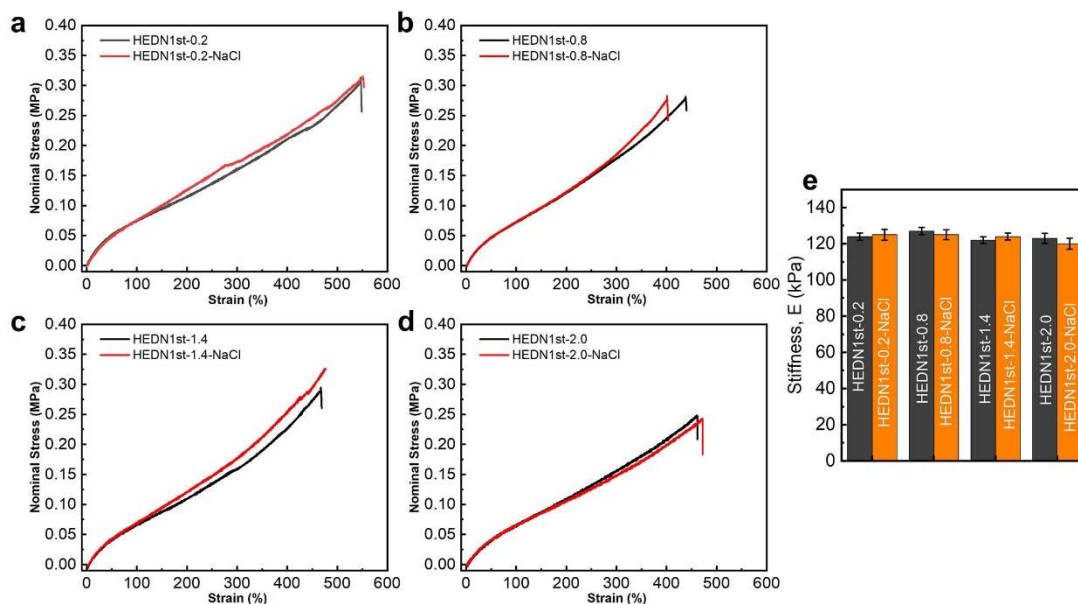

**Supplementary Figure 3** Tensile stress-strain curves of HEDN1st-0.2 (a), HEDN1st-0.8 (b), HEDN1st-1.4 (c) and HEDN1st-2.0 (d) hydrogels swollen by water or salt solutions (3 M NaCl). The stiffness of these hydrogels (e). Polymer fraction is 11%. Error bars represent mean  $\pm$  standard deviation (n=5).

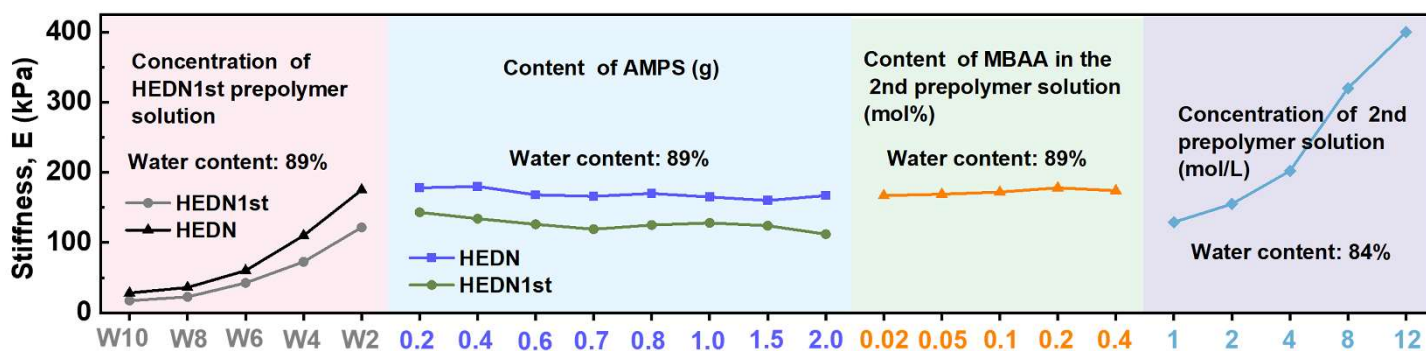

**Supplementary Figure 4** Effects of prepolymer concentration, crosslinker dosage and AMPS dosage on stiffness of HEDN1st and HEDN hydrogel, respectively.

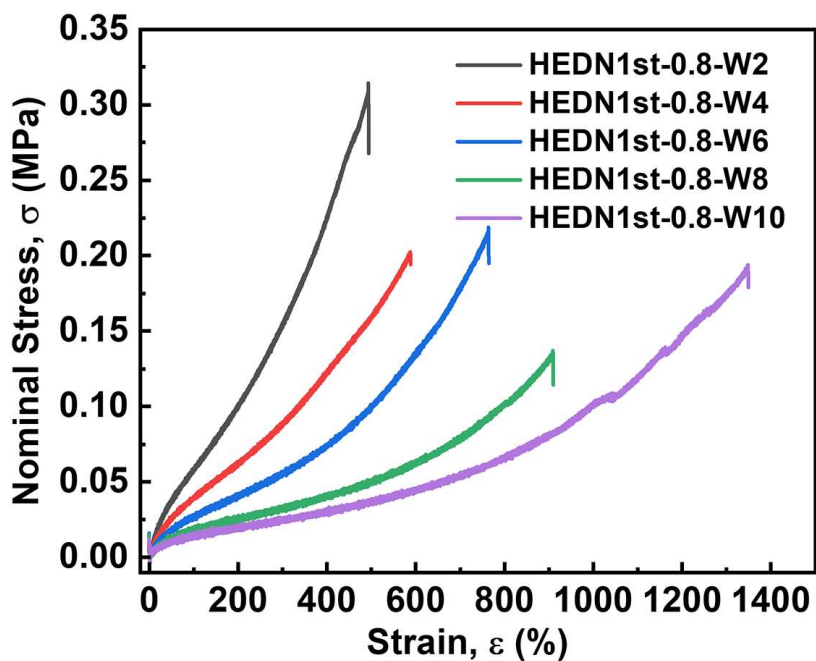

Supplementary Figure 5 Tensile stress-strain curves of HEDN1st-0.8 hydrogels with different degree of entanglements. Water content: 89%.

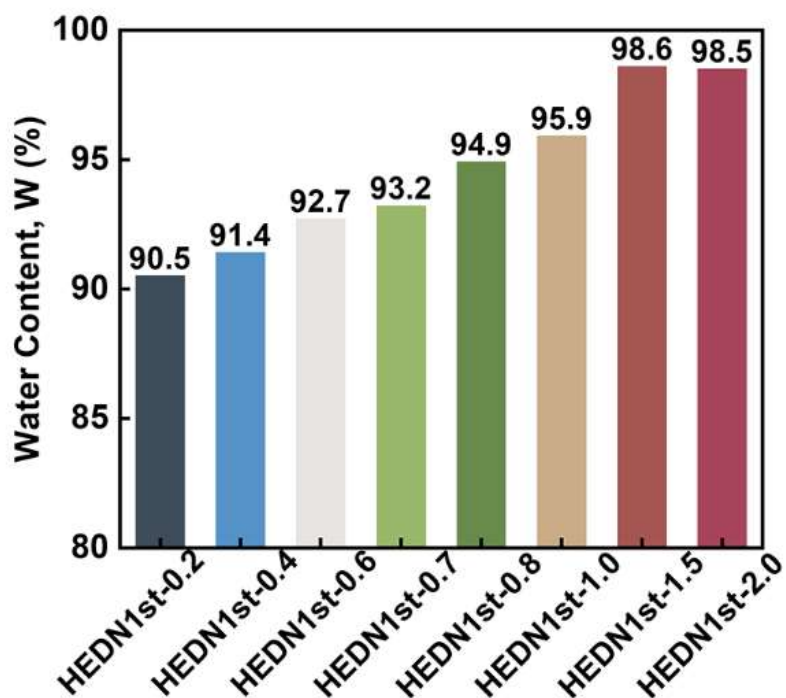

Supplementary Figure 6 Water content of HEDN1st hydrogels with different AMPS contents.

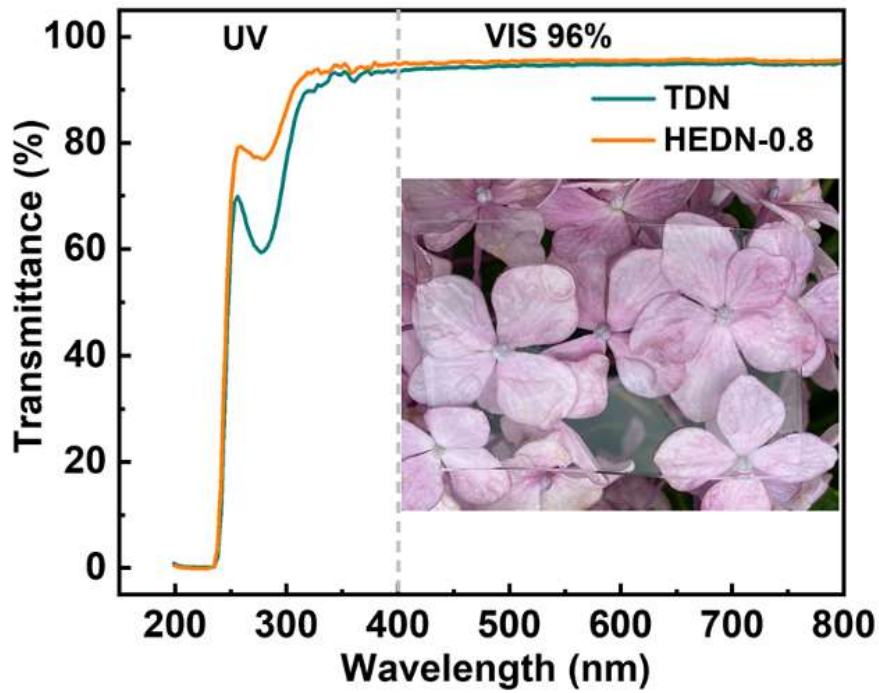

**Supplementary Figure 7** UV- visible light transmission spectra of TDN and HEDN-0.8 hydrogels. Inner image: Photo of HEDN-0.8 hydrogel on flowers.

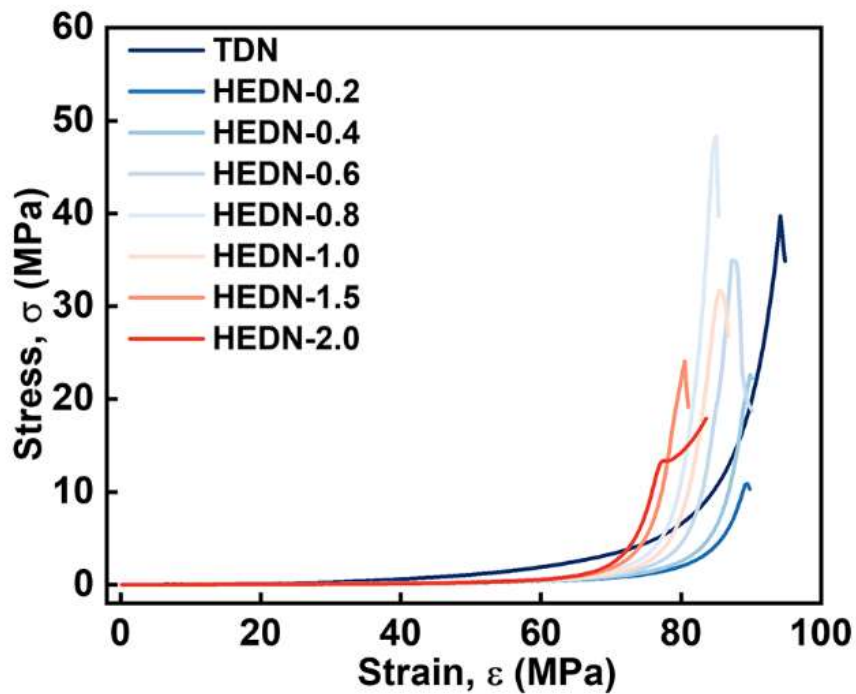

**Supplementary Figure 8** Compressive stress-strain curves of TDN hydrogel and HEDN hydrogels with different AMPS contents.

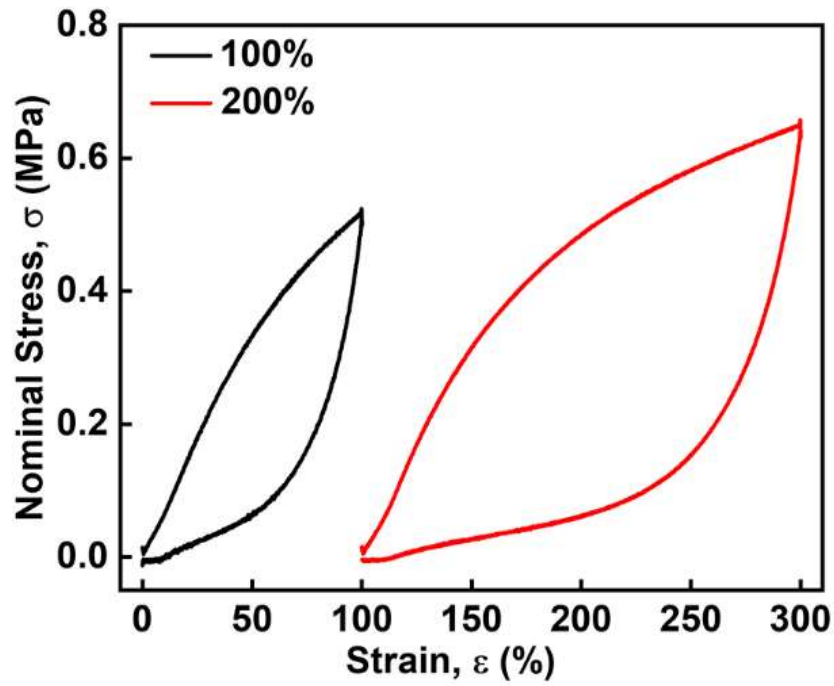

Supplementary Figure 9 Single cyclic tensile curves of TDN hydrogel at 100% and 200% strain.

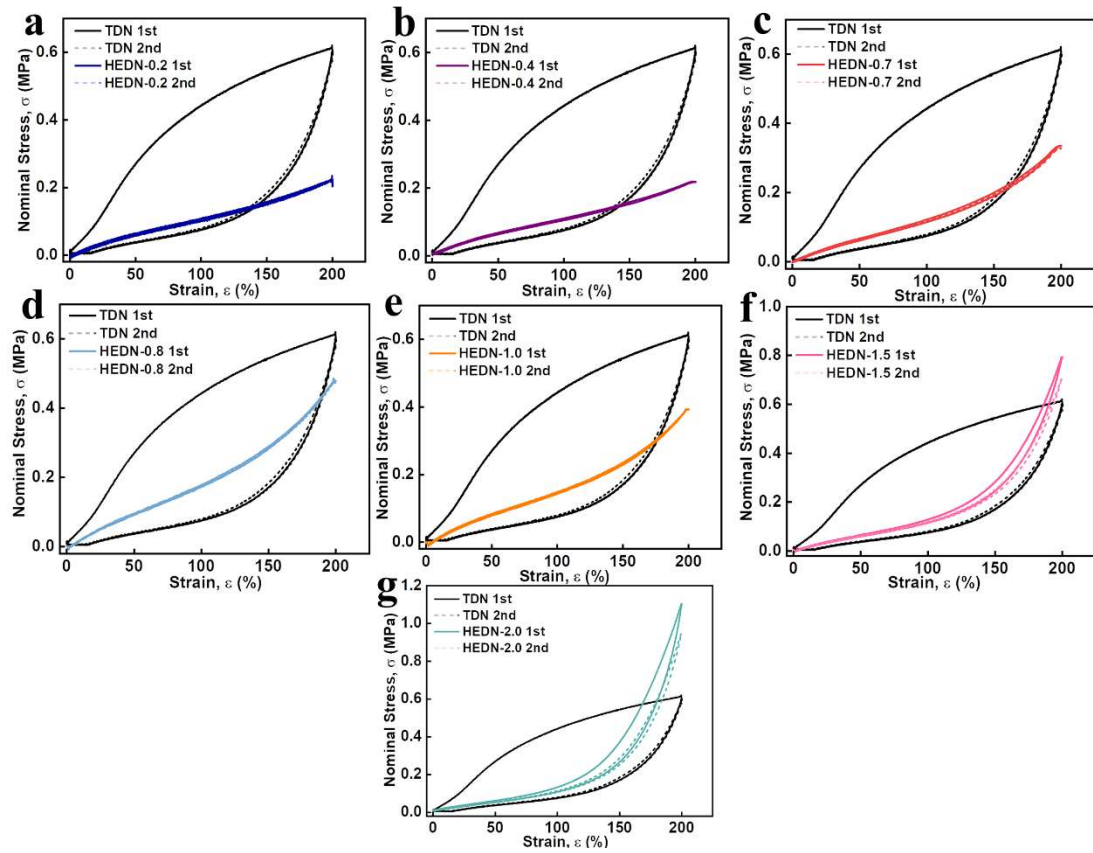

Supplementary Figure 10 Comparison of the two-cycle tensile curves of HEDN



hydrogels with different AMPS contents and TDN hydrogel at 200% strain. The reversibility of HEDN-1.5 and HEDN-2.0 hydrogel are 90% and 82%, respectively. Due to the low fracture strain of the two hydrogels, which had partially broken polymer chains when stretched to 200%.

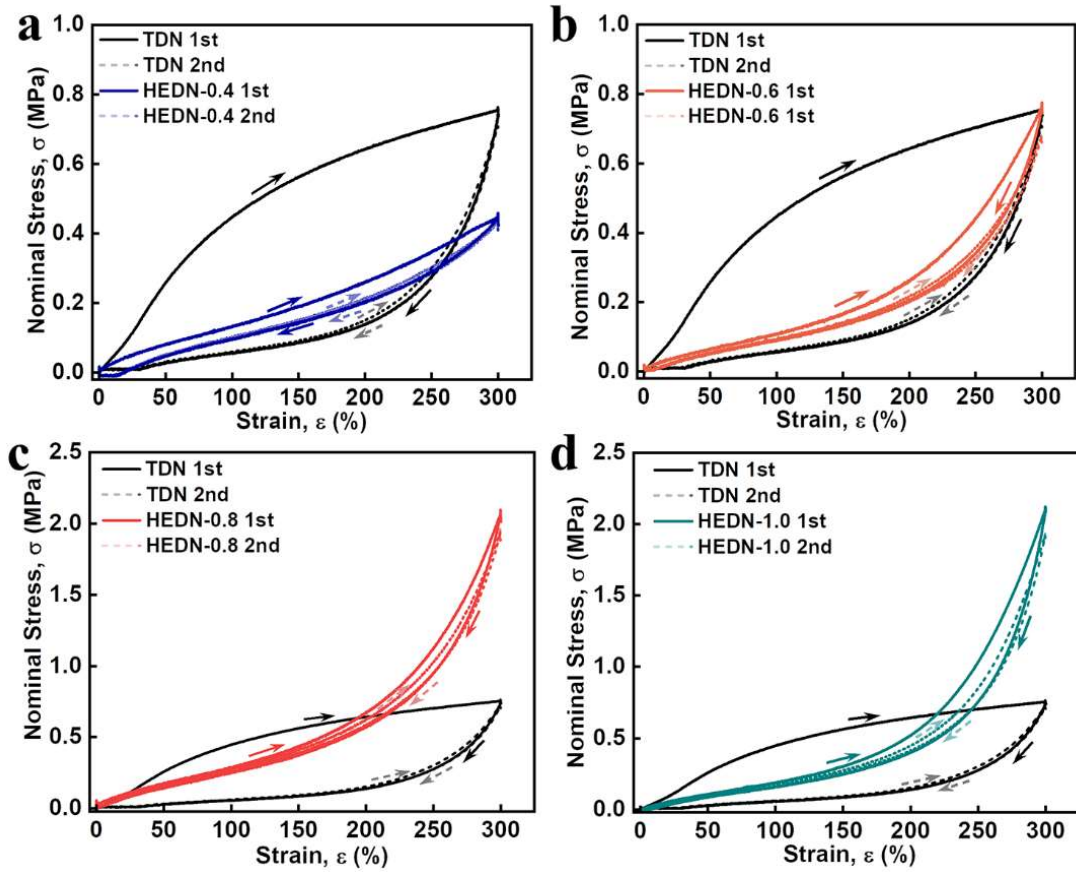

**Supplementary Figure 11** Comparison of the two-cycle tensile curves of HEDN hydrogels with different AMPS contents and TDN hydrogel at 300% strain.

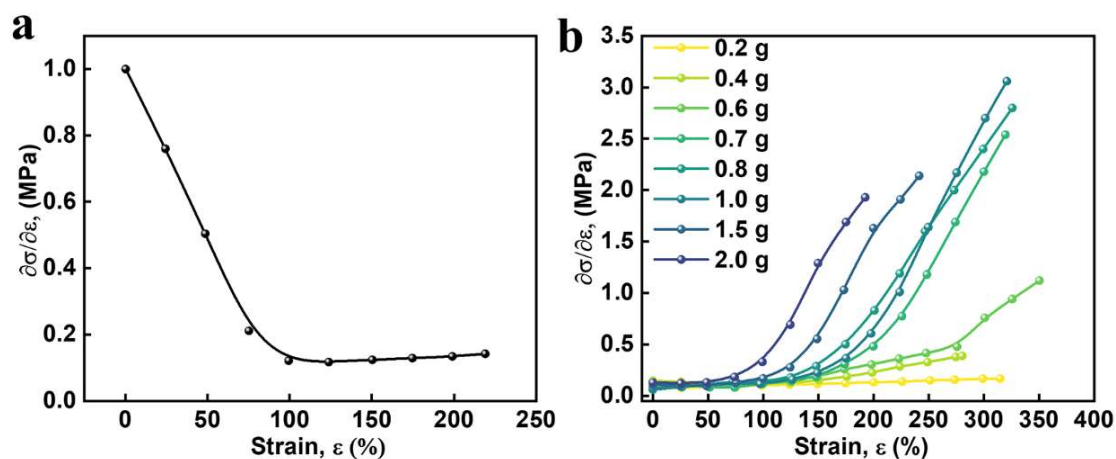

**Supplementary Figure 12** Differential modulus ( $\partial\sigma/\partial\lambda$ ) of TDN hydrogel (a) and HEDN hydrogels (b) with different AMPS contents against strain  $\epsilon$ .

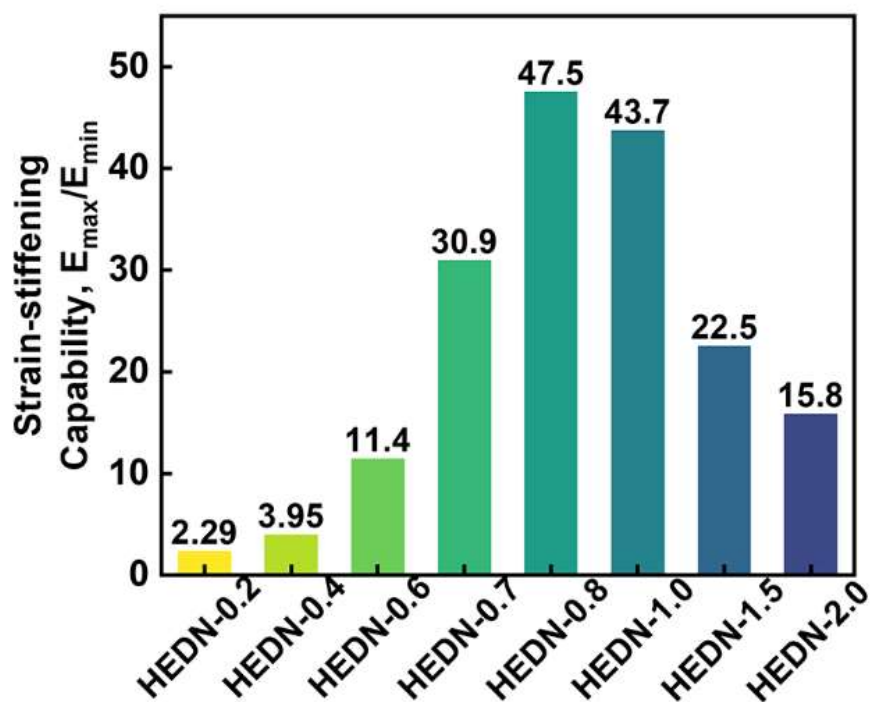

**Supplementary Figure 13** Strain-stiffening capability of HEDN hydrogels with different AMPS contents.

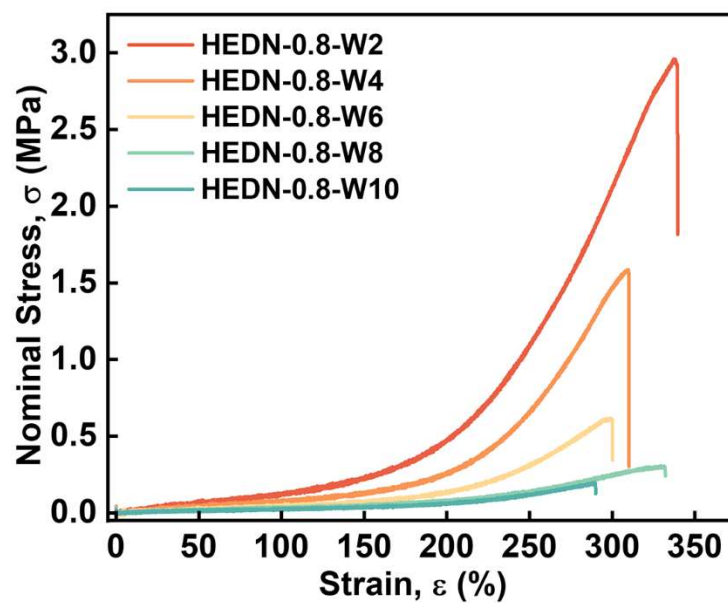

**Supplementary Figure 14** Tensile stress-strain curves of HEDN-0.8 hydrogels with different degree of entanglements.

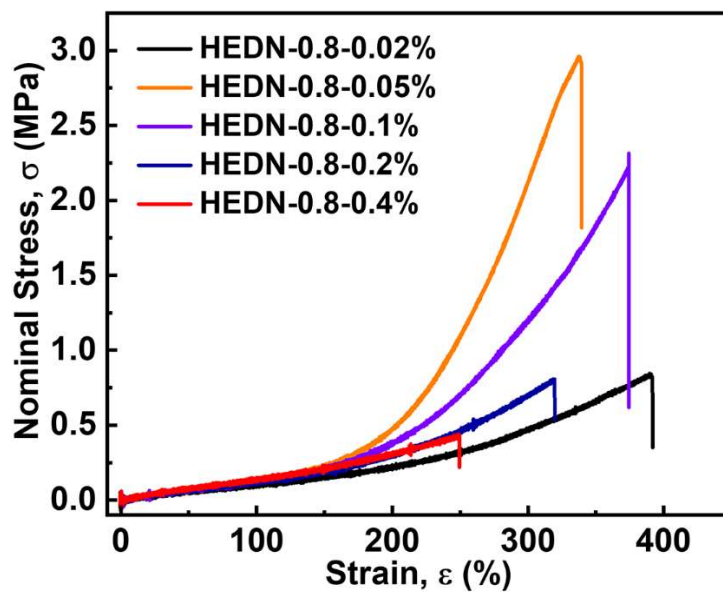

**Supplementary Figure 15** Tensile stress-strain curves of HEDN-0.8 hydrogels with various contents of 2nd network MBAA. Water content: 89%.

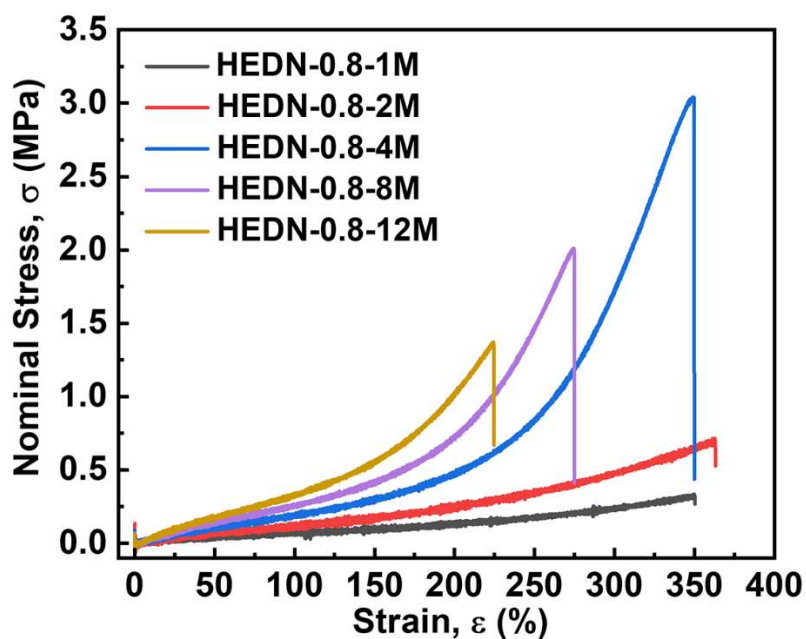

**Supplementary Figure 16** Tensile stress–strain curves of HEDN-0.8 hydrogels with various concentrations of 2nd network monomer. Water content: 84%.

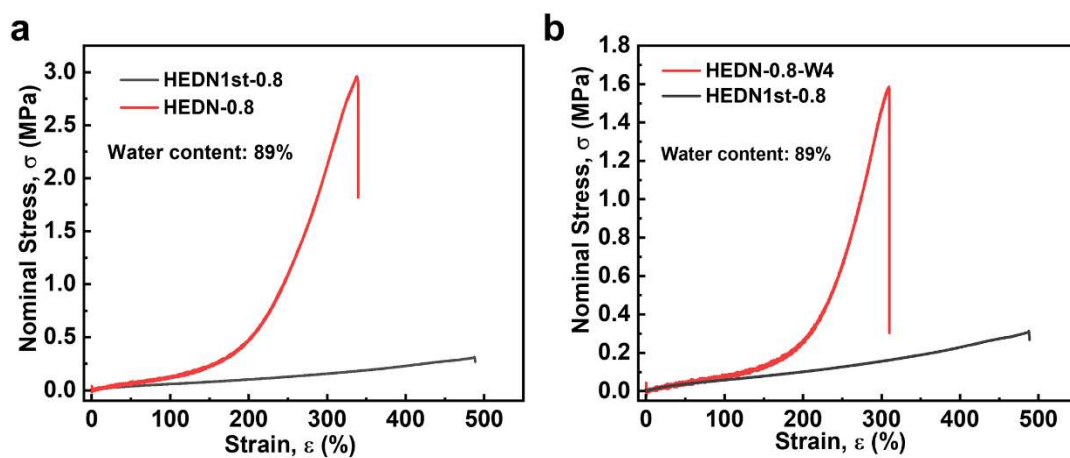

**Supplementary Figure 17 a** Tensile stress–strain curves of HEDN1st-0.8 hydrogel and HEDN-0.8 hydrogels with the same level of water content. **b** Tensile stress–strain curves of HEDN1st-0.8 hydrogel and HEDN-0.8-W4 hydrogels with the same level of water content and stiffness.

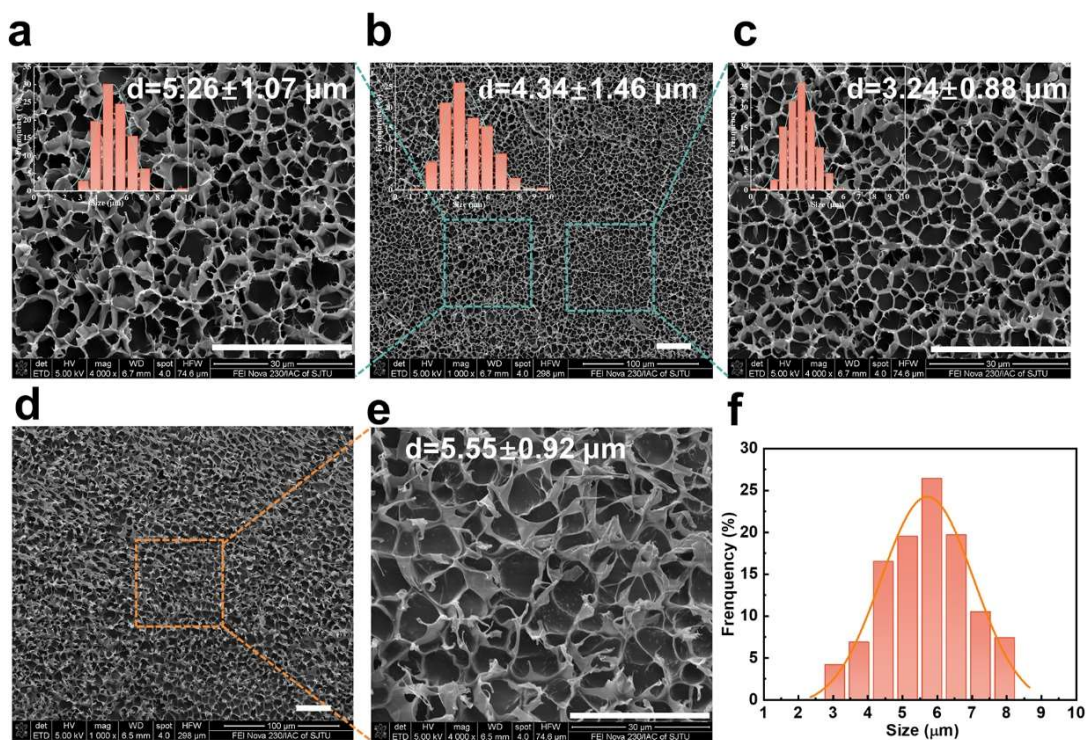

**Supplementary Figure 18** a SEM images of large-pore microdomains in TDN hydrogel. inner image is a pore size statistical distribution. b SEM images of large and small pore microdomains in TDN hydrogels. c SEM images of small-pore microdomains in TDN hydrogel. d,e SEM images of HEDN-0.8 hydrogels at different magnifications. f Pore size statistical distribution of HEDN-0.8. Scale bars, 30  $\mu\text{m}$ .

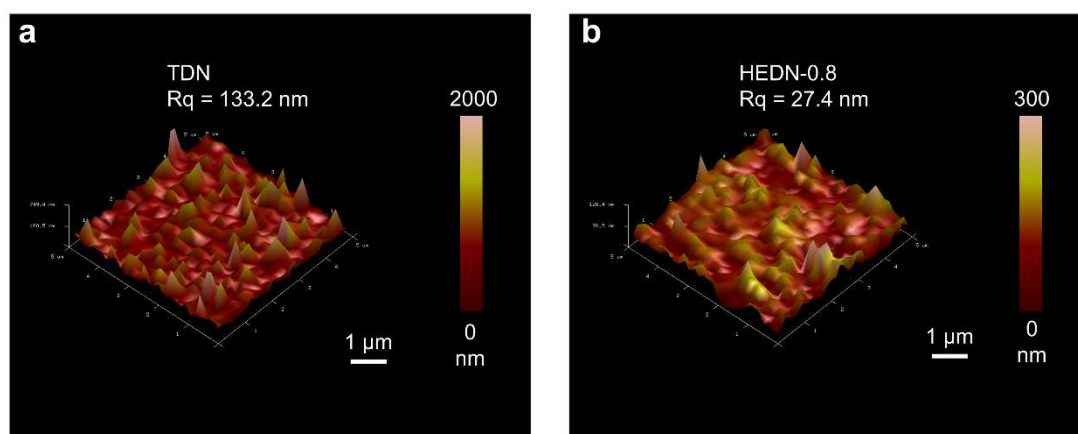

**Supplementary Figure 19** AFM height images of TDN hydrogel and HEDN-0.8 hydrogel in wet state.

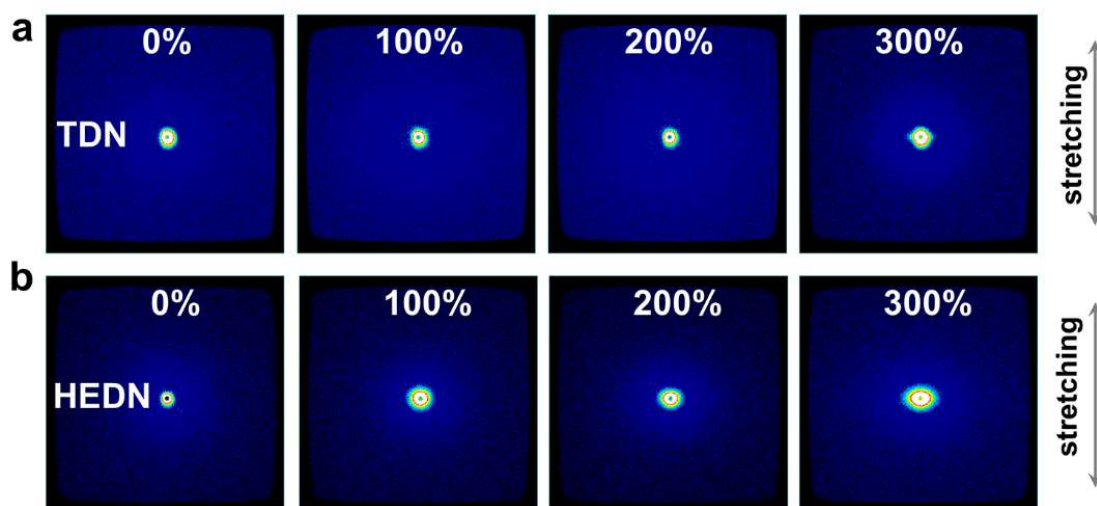

**Supplementary Figure 20** SAXS patterns of TDN (a) and HEDN-0.8 hydrogels (b) with different strains during in situ stretching. The arrow indicates the stretching direction.

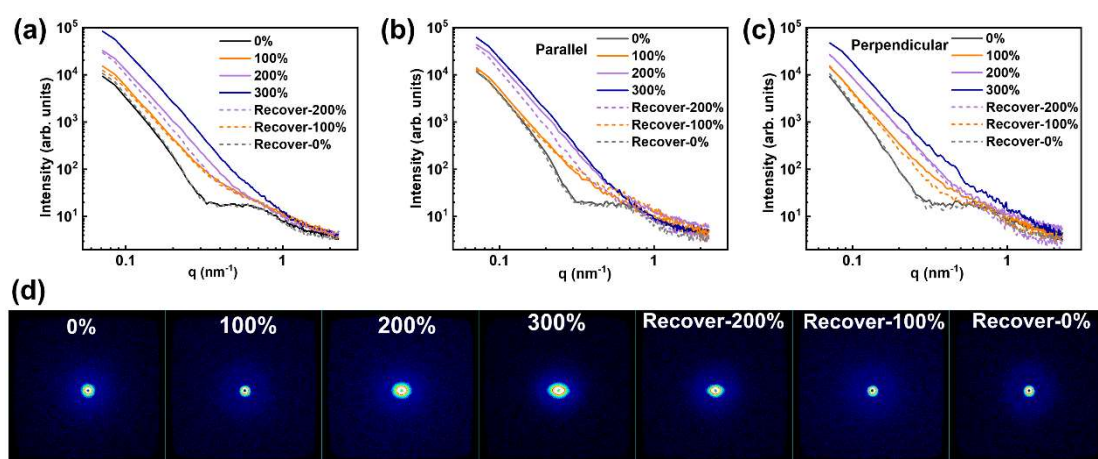

**Supplementary Figure 21 a** One-dimensional SAXS profiles of HEDN-0.8 hydrogel. **b-c** 1D SAXS profiles of HEDN-0.8 hydrogels with different strains in parallel (b) and perpendicular (c) directions. **d** 2D SAXS patterns of HEDN-0.8 hydrogels with different strains.
