# Supplementary material for: Tough double network hydrogels with rapid self-reinforcement and low hysteresis based on highly entangled networks
Source: PubMed Central journal article supplement (PMC10864390; doi:10.1038/s41467-024-45485-8), 2024-02-13
Supplement: 41467_2024_45485_MOESM3_ESM.pdf [file 41467_2024_45485_MOESM3_ESM.pdf]

## **Description of Additional Supplementary Files**

**File Name:** Supplementary Movie 1

**Description:** Interference color change of TDN hydrogel under polarized mode in-situ stretching. The interference color gradually appeared and brightened with the increase of tensile strain.

**File Name:** Supplementary Movie 2

**Description:** Interference color change of HEDN-0.8 hydrogel under polarized mode in-situ stretching. The interference color gradually appeared with the increase of tensile strain, and then gradually brightened, and finally showed a color change in accordance with Michel-Levy chart.

**File Name:** Supplementary Movie 3

**Description:** Crack growth of notched TDN hydrogel.

**File Name:** Supplementary Movie 4

**Description:** Crack blunting and growth of notched HEDN-0.8 hydrogel.

**File Name:** Supplementary Movie 5

**Description:** Interference color distribution of notched TDN hydrogel under polarized mode in-situ stretching. The Interference color is distributed only around the notch.

**File Name:** Supplementary Movie 6

**Description:** Interference color distribution of notched HEDN-0.8 hydrogel under polarized mode in-situ stretching. The interference color is distributed in the bulk of the gel, and the brightness of the interference color is almost the same as that around the notch.
